# Supplementary material
Source: PubMed Central journal article supplement (PMC5063048)

# Vegetative/phenology-related traits

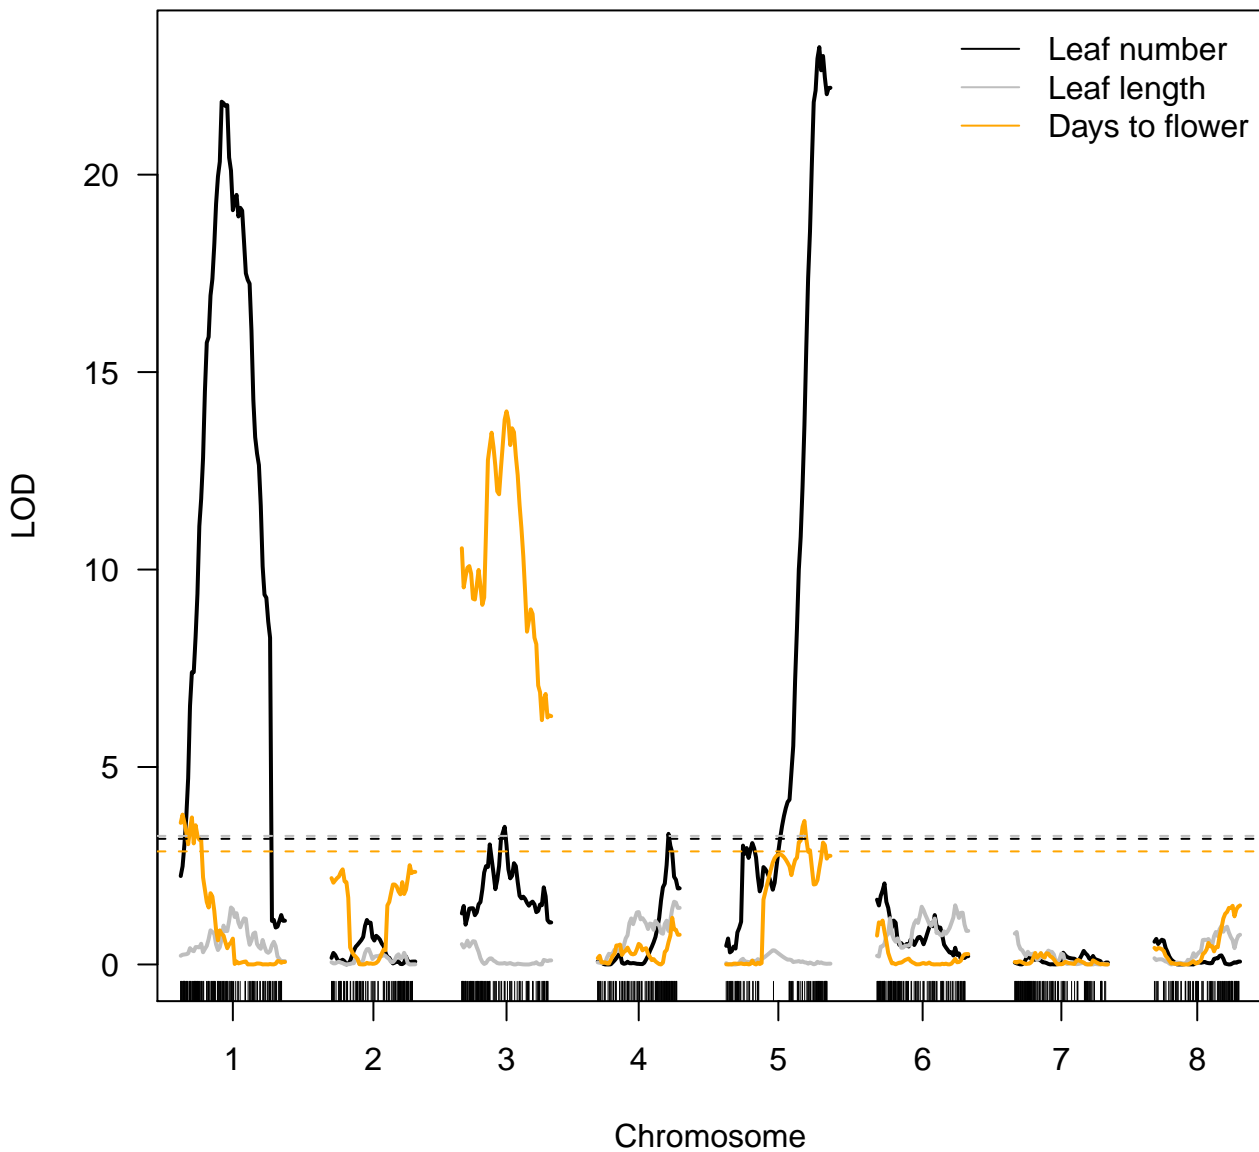

# Floral traits

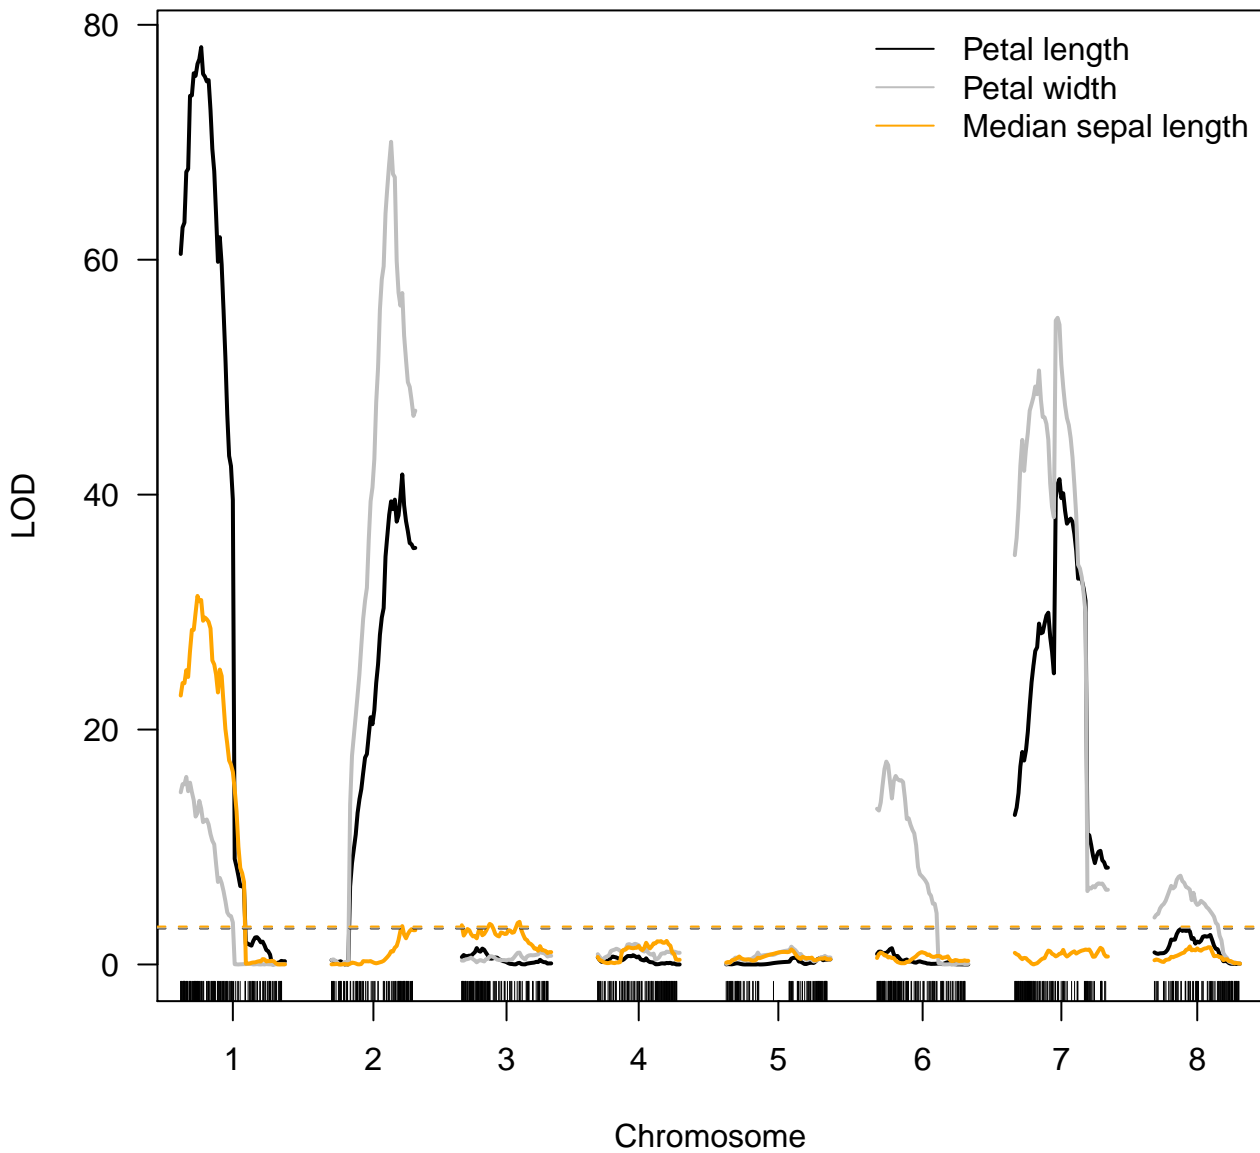

# Floral traits

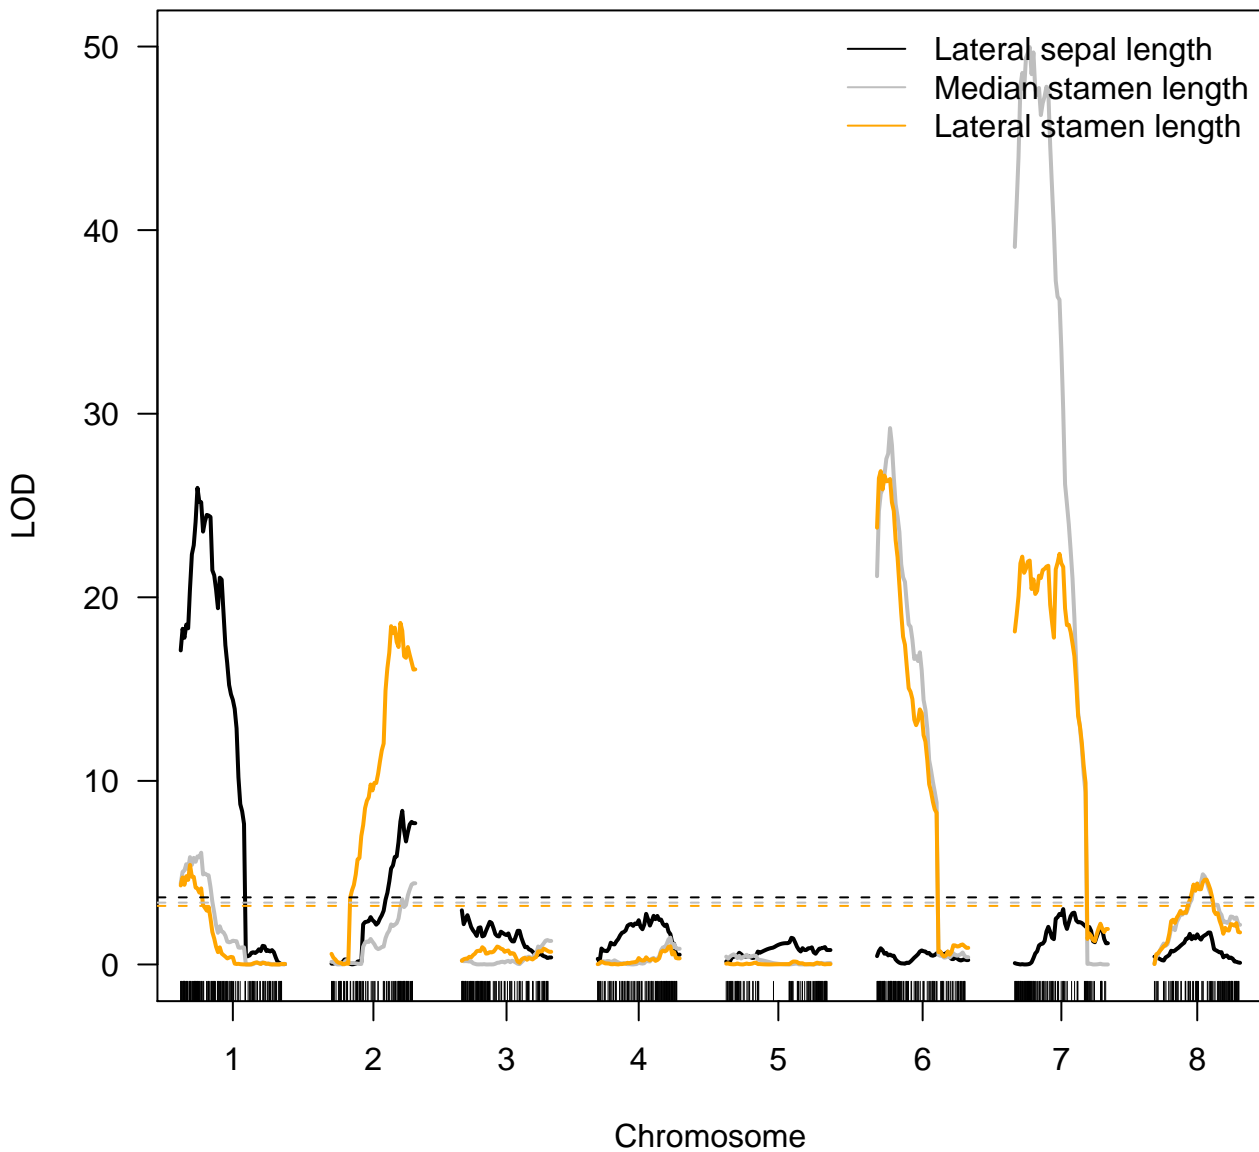

# Floral/reproductive traits

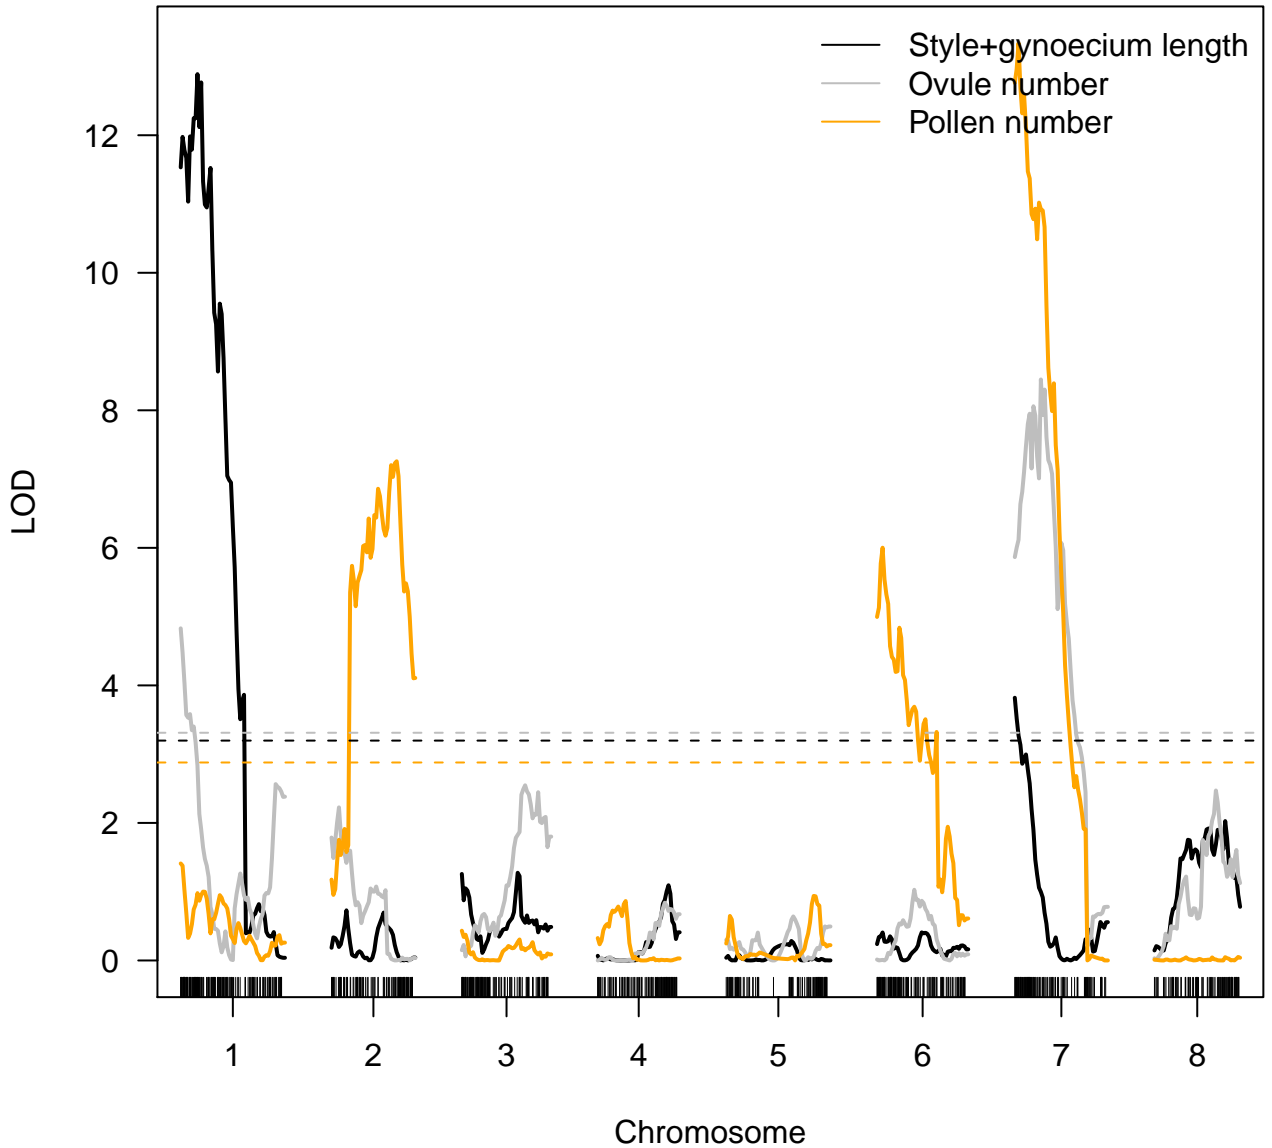

Supplement: NIHMS818038-supplement-FigS1.pdf [file NIHMS818038-supplement-FigS1.pdf]
