# Supplementary material
Source: PubMed Central journal article supplement (PMC5063048)
Supplement: NIHMS818038-supplement-FigS2.pdf [file NIHMS818038-supplement-FigS2.pdf]

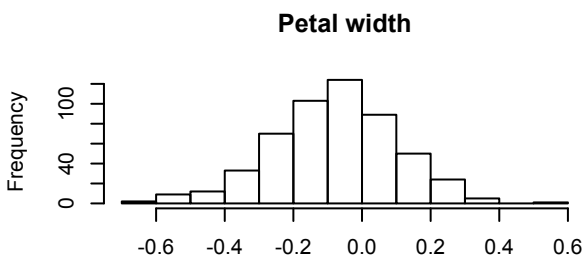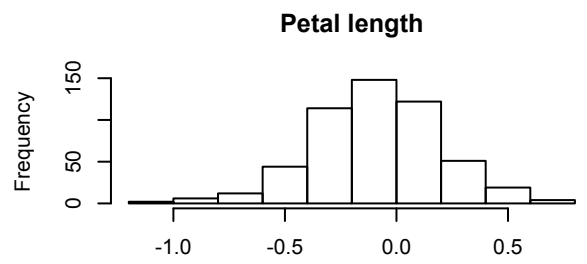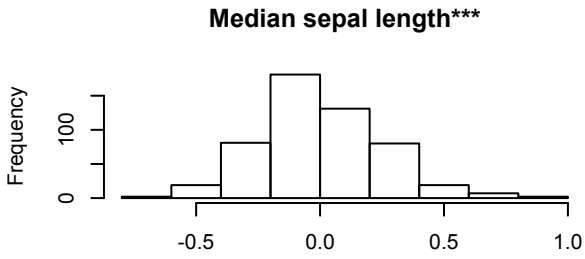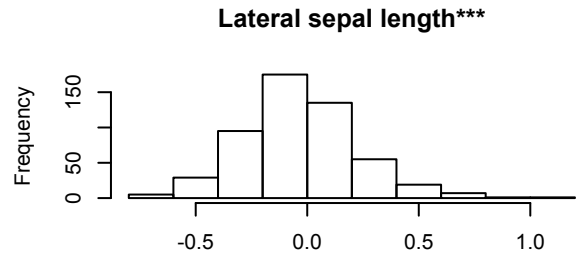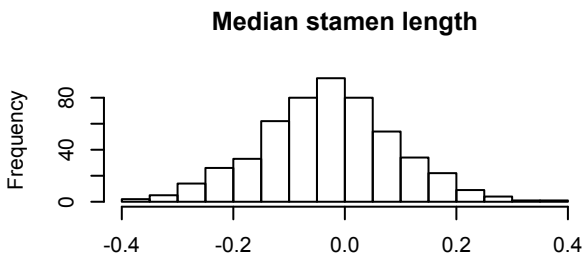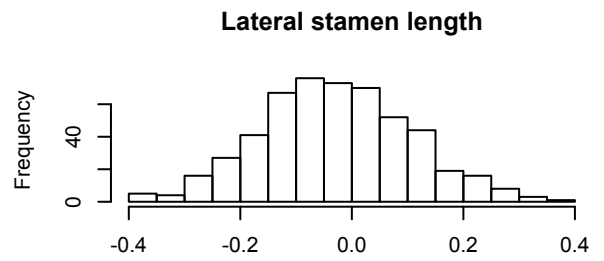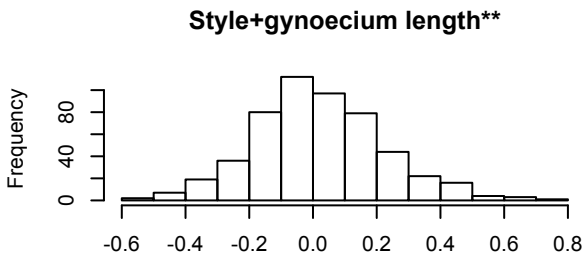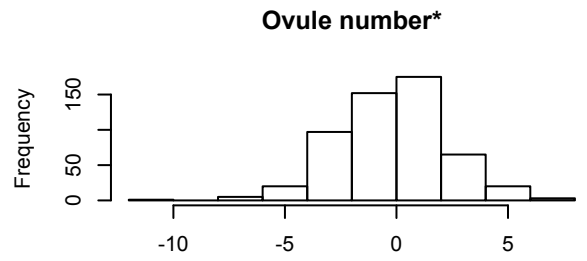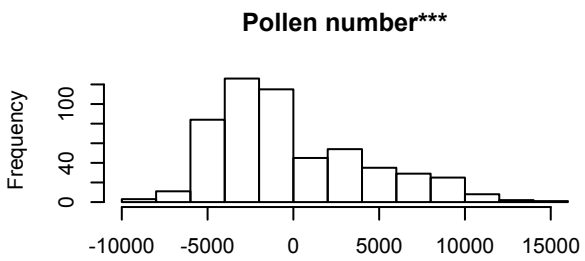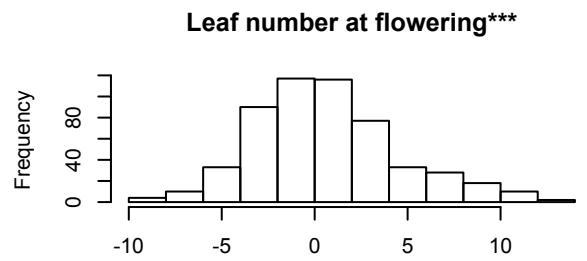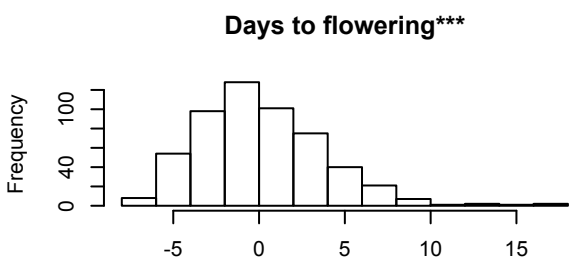

Figure S2. Distributions of residuals after accounting for significant QTL effects. Departures from normality are indicated by asterisks (\* $P < 0.05$ ; \*\* $P < 0.01$ ; \*\*\* $P < 0.001$ ).
