# Supplementary material
Source: PubMed Central journal article supplement (PMC5063048)
Supplement: NIHMS818038-supplement-FigS3.pdf [file NIHMS818038-supplement-FigS3.pdf]

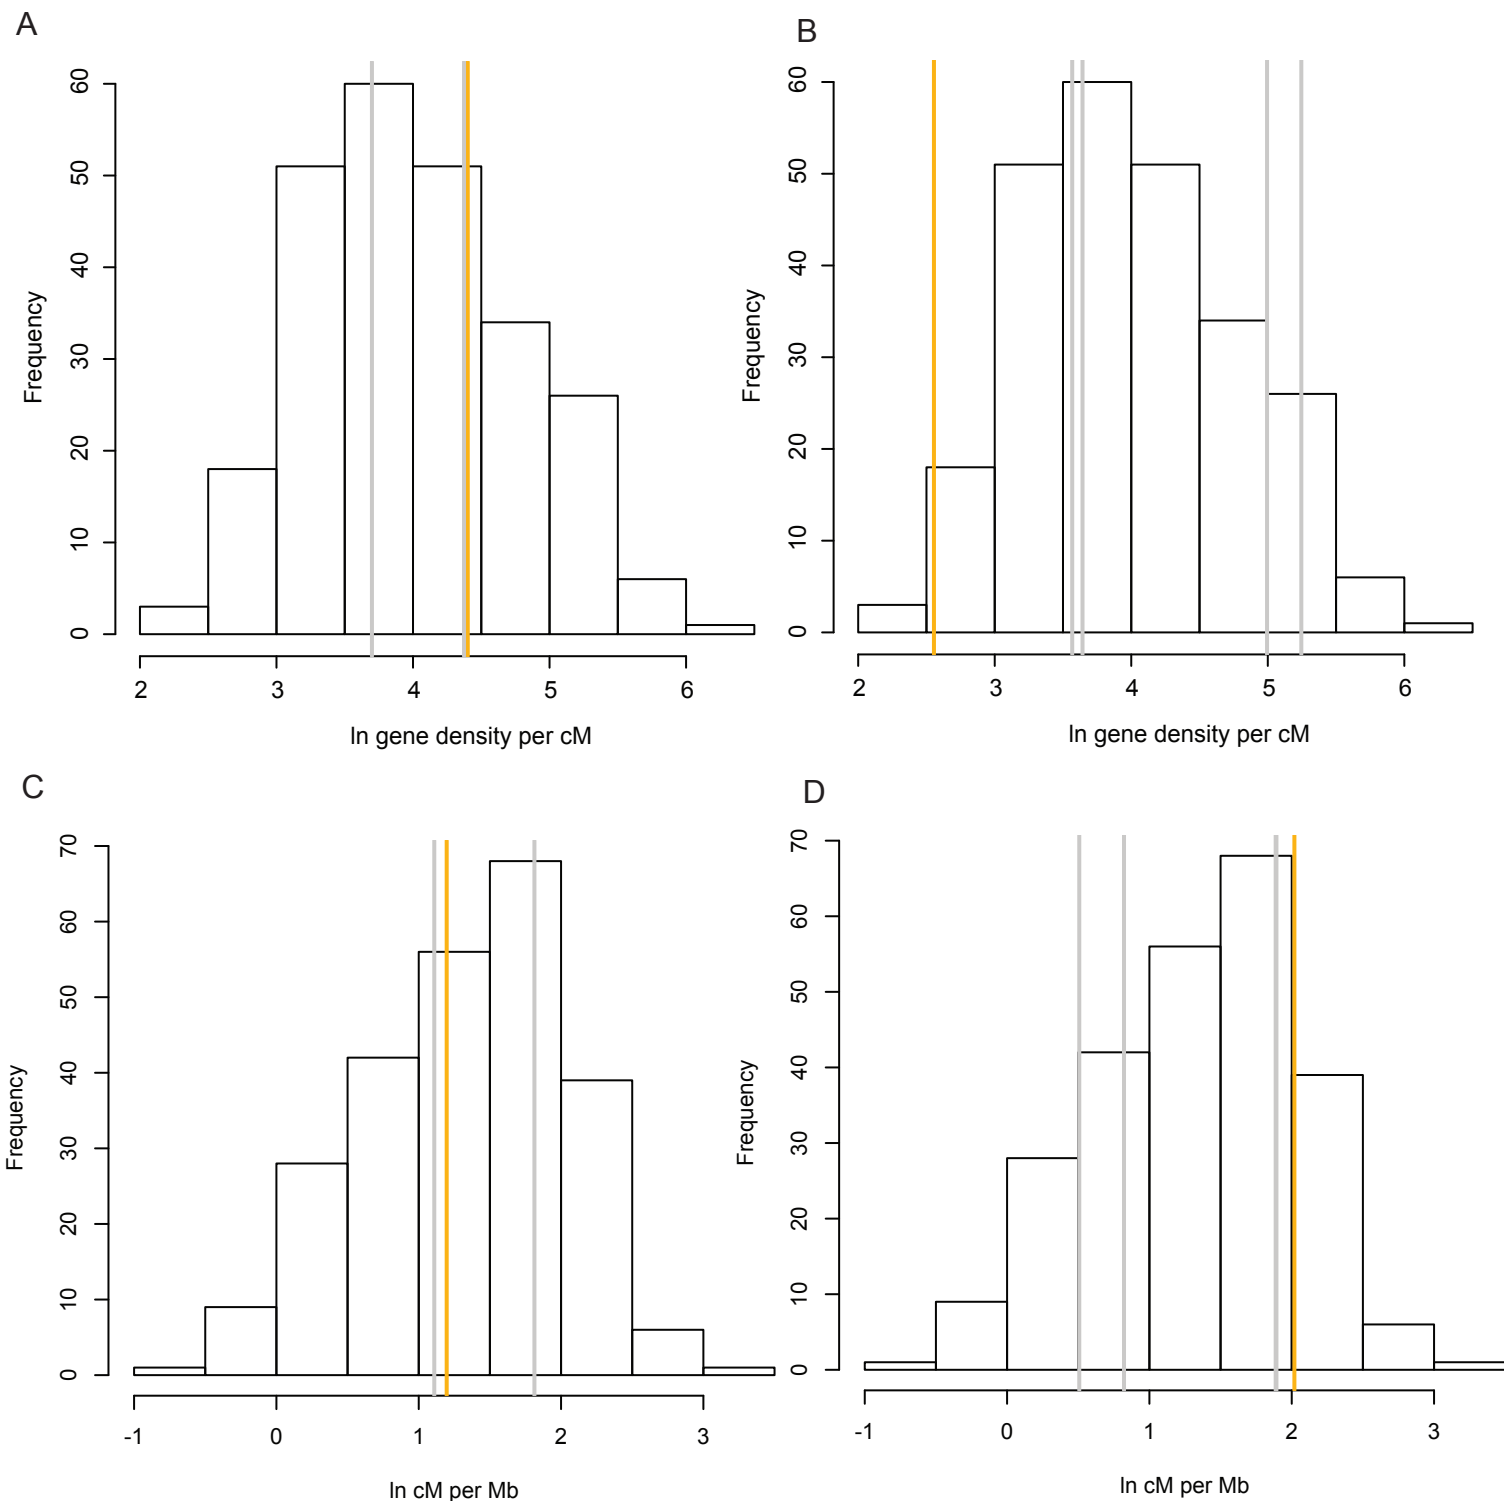

Figure S2. Gene density (A and B) and recombination rate variation (C and D) across the genome and within 1.5 LOD CIs for petal size QTL. The top figures show log gene densities of leading (orange lines) and other QTL (gray lines) for petal length (A) and width (B) relative to the distribution of gene density in  $\sim 1\text{cM}$  bins across the genome (histogram). The bottom figures show log cM/Mb across the genome (histogram) and for petal length (C) and width (D) QTL regions, again with leading QTL indicated by orange lines.
